# Supplementary material
Source: PubMed Central journal article supplement (PMC6323635)
Supplement: NIHMS999956-supplement-supplemental.pdf [file NIHMS999956-supplement-supplemental.pdf]

# Supporting Information

## Screening and Biological Effects of Marine Pyrroloiminoquinone

### Alkaloids: Potential Inhibitors of the HIF-1 $\alpha$ /p300 Interaction

Andrew K.L. Goey,<sup>†</sup> Cindy H. Chau,<sup>†</sup> Tristan M. Sissung,<sup>†</sup> Kristina M. Cook,<sup>†</sup> David J. Venzon,<sup>‡</sup> Amaya Castro,<sup>§</sup> Tanya R. Ransom,<sup>§</sup> Curtis J. Henrich,<sup>§,⊥</sup> Tawnya C. McKee,<sup>§</sup> James B. McMahon,<sup>§</sup> Tanja Grkovic,<sup>||</sup> Melissa M. Cadelis,<sup>||</sup> Brent R. Copp,<sup>||</sup> Kirk R. Gustafson,<sup>§</sup> and William D. Figg\*,<sup>†</sup>

<sup>†</sup> Clinical Pharmacology Program, National Cancer Institute, Bethesda, Maryland 20892, United States

<sup>‡</sup> Biostatistics & Data Management Section, National Cancer Institute, Bethesda, Maryland 20892, United States

<sup>§</sup> Molecular Targets Laboratory, Center for Cancer Research, National Cancer Institute, Frederick, Maryland 21702-1201, United States

<sup>⊥</sup> Basic Science Program, Leidos Biomedical Research, Inc., Frederick National Laboratory for Cancer Research, Frederick, Maryland 21702-1201, United States

<sup>||</sup> School of Chemical Sciences, University of Auckland, Auckland 1142, New Zealand

#### Table of Contents:

|                                                                                   |           |
|-----------------------------------------------------------------------------------|-----------|
| I) Cytotoxicity of Pyrroloiminoquinone Alkaloids in COLO 205 Cells                | Page S2-3 |
| II) HIF Reporter Assay Results of Pyrroloiminoquinone Alkaloids in COLO 205 Cells | Page S4-5 |

## I) Cytotoxicity of Pyrroloiminoquinone Alkaloids in COLO 205 Cells

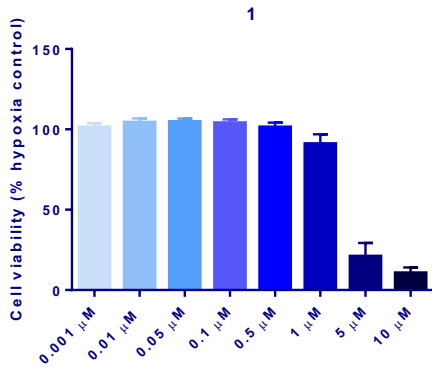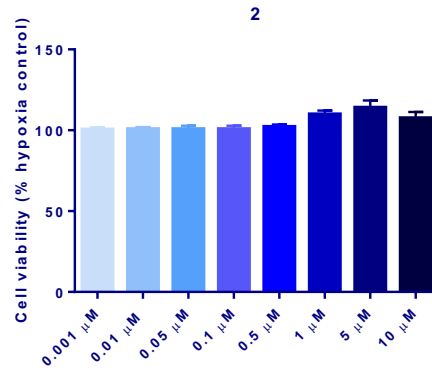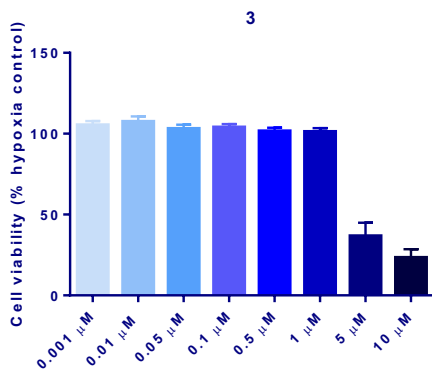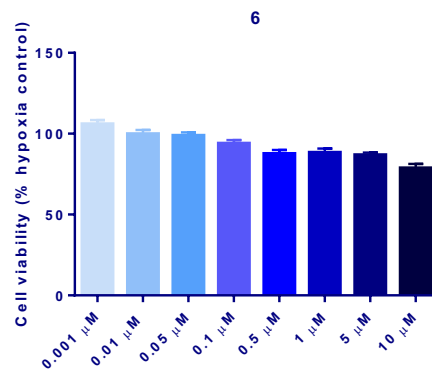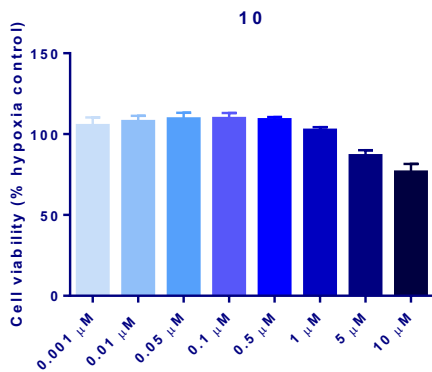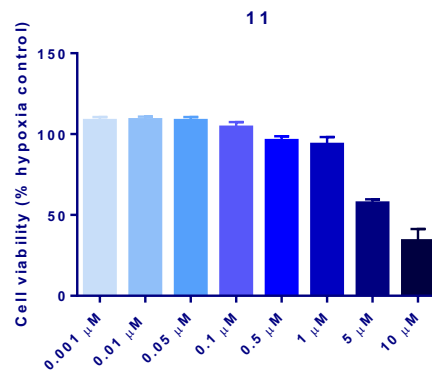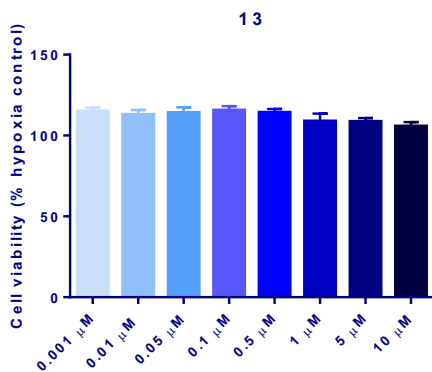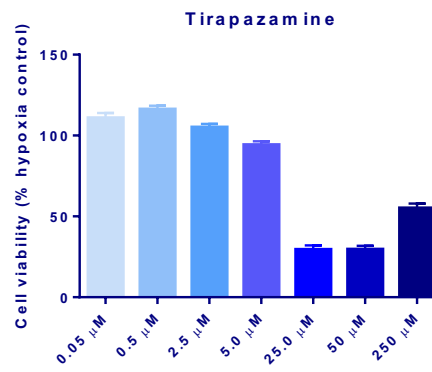

**Figure S1.** Cytotoxicity (CCK-8) results of pyrroloiminoquinone alkaloids (compounds **1-3, 6, 10, 11, 13** and tirapazamine control) in COLO 205 cells after 48 h treatment under hypoxic conditions (0.5% O<sub>2</sub>). Results are presented as the average of triplicate experiments  $\pm$  SEM (n = 3-4).

**II) HIF Reporter Assay Results of Pyrroloiminoquinone Alkaloids in COLO 205 Cells**

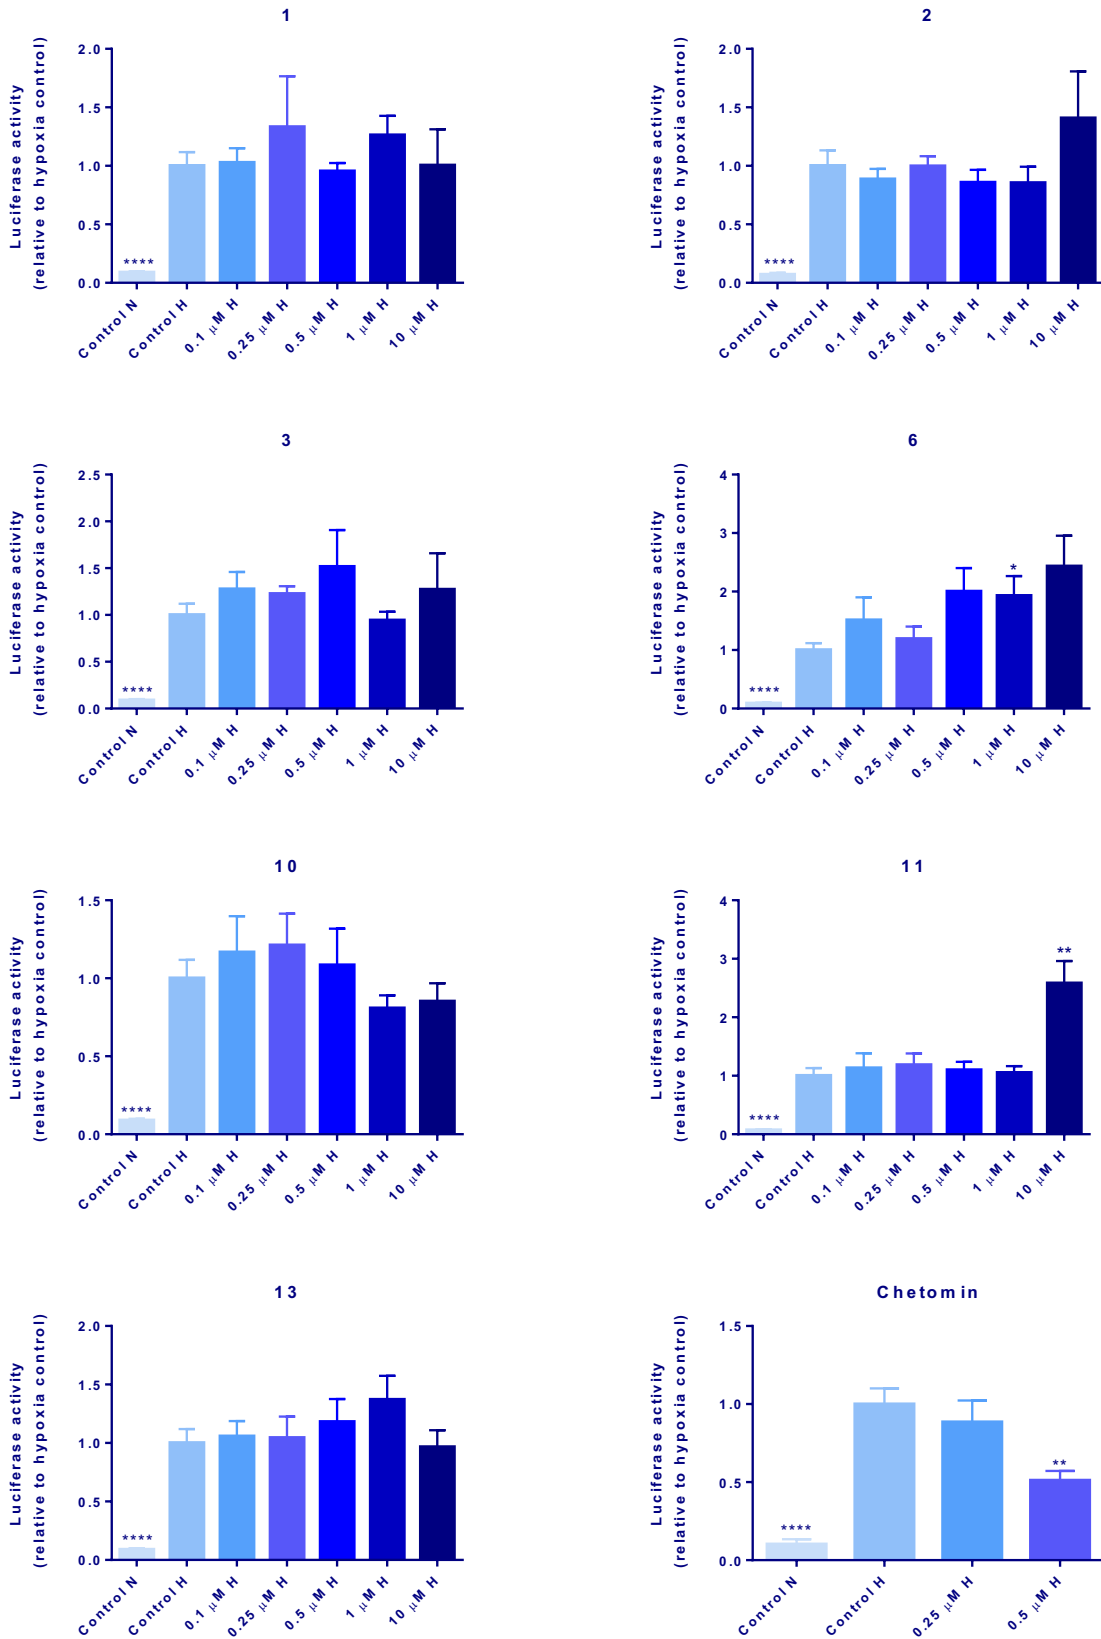

**Figure S2.** HIF reporter assay results of pyrroloiminoquinone alkaloids (compounds **1-3**, **6**, **10**, **11**, **13** and chetomin control) in COLO 205 cells after 18 h treatment under hypoxic conditions (0.5% O<sub>2</sub>). Reporter activity values of discorhabdins are normalized to hypoxia control and are expressed as the average of triplicate experiments  $\pm$  SEM (n = 4). Data were analyzed using the Wilcoxon rank sum test with Hochberg's method for adjusting P values for multiple comparisons (reference group: Control H). \* P  $\leq$  0.05, \*\* P  $\leq$  0.01, \*\*\*\* P  $\leq$  0.0001. N = normoxia; H = hypoxia.
